# Supplementary material for: Fsp1-Mediated Lineage Tracing Fails to Detect the Majority of Disseminating Cells Undergoing EMT
Source: PubMed Central journal article supplement (PMC6899519; doi:10.1016/j.celrep.2019.10.107), 2019-11-26
Supplement: mmc1.pdf [file mmc1.pdf]

Cell Reports, Volume 29

## Supplemental Information

### ***Fsp1*-Mediated Lineage Tracing Fails to Detect the Majority of Disseminating Cells Undergoing EMT**

**Laura Bornes, Roan Hugo van Scheppingen, Evelyne Beerling, Tim Schelfhorst, Saskia Inge  
Johanna Ellenbroek, Danielle Seinstra, and Jacco van Rheenen**

A

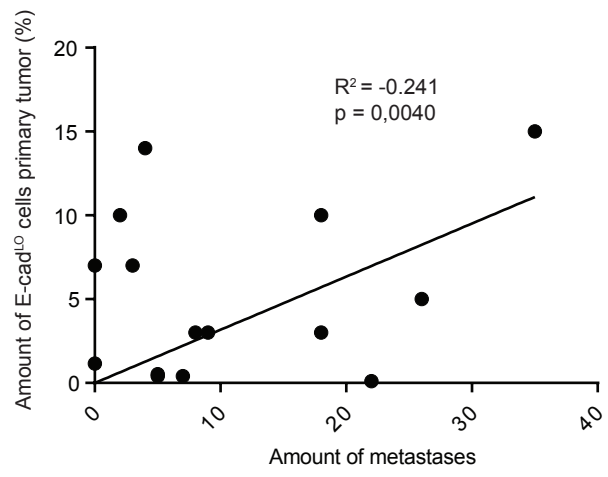

**Figure S1:** Mesenchymal E-cad<sup>LO</sup> population in the primary tumor is proportional to amount of metastases. Related to Figures 1 and 2.

(A) The percentage of E-cad<sup>LO</sup> cells in the primary tumor relates to the amount of metastases.  
( $p=0,0040$ )

| Mouse   | Donor tumor | time of tumor growth wks | Macro Metastases       |                        |       | FACS analysis | Primary tumor    |                                   |                  |                    |                    | CTCs       |                      |                  |                                   |                  |                    |                    |
|---------|-------------|--------------------------|------------------------|------------------------|-------|---------------|------------------|-----------------------------------|------------------|--------------------|--------------------|------------|----------------------|------------------|-----------------------------------|------------------|--------------------|--------------------|
|         |             |                          | >99.9 RFP <sup>+</sup> | >99.9 GFP <sup>+</sup> | total |               | RFP <sup>+</sup> | RFP <sup>+</sup> GFP <sup>+</sup> | GFP <sup>+</sup> | Ecad <sup>Hi</sup> | Ecad <sup>Lo</sup> | blood (ul) | total amount of CTCs | RFP <sup>+</sup> | RFP <sup>+</sup> GFP <sup>+</sup> | GFP <sup>+</sup> | Ecad <sup>Hi</sup> | Ecad <sup>Lo</sup> |
| 1       | 1           | 8,4                      | 26                     | 0                      | 26    | YES           | 99,68            | 0,19                              | 0,13             | 94                 | 5                  | 950        | 501                  | 99,6             | 0,2                               | 0,2              | 92,8               | 7,2                |
| 2       | 1           | 7,4                      | 8                      | 1                      | 9     | YES           | 99,92            | 0,06                              | 0,02             | 96                 | 3                  | 500        | 0                    | 0                | 0                                 | 0                | 0                  | 0                  |
| 3       | 1           | 9,4                      | 9                      | 0                      | 9     | YES           | 99,46            | 0,25                              | 0,29             | 96                 | 3                  | 850        | 9                    | 100              | 0                                 | 0                | 55,6               | 44,4               |
| 4       | 1           | 8,1                      | 18                     | 0                      | 18    | YES           | 99,56            | 0,32                              | 0,12             | 89                 | 10                 | 350        | 3                    | 100              | 0                                 | 0                | 66,7               | 33,3               |
| 5       | 1           | 6,4                      | 0                      | 0                      | 0     | YES           | 99,86            | 0,08                              | 0,06             | 92                 | 7                  | 850        | 2                    | 100              | 0                                 | 0                | 50                 | 50                 |
| 6       | 1           | 6,0                      | 3                      | 0                      | 3     | NO            |                  |                                   |                  |                    |                    |            |                      |                  |                                   |                  |                    |                    |
| 7       | 1           | 4,3                      | 0                      | 0                      | 0     | NO            |                  |                                   |                  |                    |                    |            |                      |                  |                                   |                  |                    |                    |
| 8       | 1           | 6,0                      | 35                     | 0                      | 35    | YES           | 99,79            | 0,05                              | 0,16             | 84                 | 15                 | 650        | 0                    | 0                | 0                                 | 0                | 0                  | 0                  |
| 9       | 1           | 4,0                      | 5                      | 0                      | 5     | NO            |                  |                                   |                  |                    |                    |            |                      |                  |                                   |                  |                    |                    |
| 10      | 1           | 6,3                      | 0                      | 0                      | 0     | NO            |                  |                                   |                  |                    |                    |            |                      |                  |                                   |                  |                    |                    |
| 11      | 2           | 7,1                      | 3                      | 0                      | 3     | YES           | 95,00            | 2,27                              | 2,67             | 92                 | 7                  | 1100       | 0                    | 0                | 0                                 | 0                | 0                  | 0                  |
| 12      | 2           | 7,3                      | 2                      | 0                      | 2     | NO            |                  |                                   |                  |                    |                    |            |                      |                  |                                   |                  |                    |                    |
| 13      | 2           | 8,1                      | 0                      | 0                      | 0     | NO            |                  |                                   |                  |                    |                    |            |                      |                  |                                   |                  |                    |                    |
| 14      | 2           | 9,1                      | 2                      | 0                      | 2     | YES           | 98,96            | 0,42                              | 0,61             | 89                 | 10                 | 1050       | 0                    | 0                | 0                                 | 0                | 0                  | 0                  |
| 15      | 2           | 7,1                      | 8                      | 0                      | 8     | NO            |                  |                                   |                  |                    |                    |            |                      |                  |                                   |                  |                    |                    |
| 16      | 2           | 6,1                      | 8                      | 0                      | 8     | YES           | 98,68            | 0,20                              | 1,13             | 97                 | 3                  | 900        | 0                    | 0                | 0                                 | 0                | 0                  | 0                  |
| 17      | 3           | 7,1                      | 18                     | 0                      | 18    | YES           | 99,5             | 0,45                              | 0,05             | 97                 | 3                  | 700        | 0                    | 0                | 0                                 | 0                | 0                  | 0                  |
| 18      | 3           | 8,0                      | 5                      | 0                      | 5     | YES           | 99,90            | 0,08                              | 0,02             | 99,6               | 0,4                | 850        | 1                    | 100              | 0                                 | 0                | 100                | 0                  |
| 19      | 3           | 7,9                      | 7                      | 0                      | 7     | YES           | 99,8             | 0,16                              | 0,04             | 99,6               | 0,4                | 350        | 8                    | 100              | 0                                 | 0                | 87,5               | 12,5               |
| 20      | 3           | 7,9                      | 0                      | 0                      | 0     | YES           | 99,90            | 0,09                              | 0,01             | 98,85              | 1,15               | 750        | 17                   | 100              | 0                                 | 0                | 70,6               | 29,4               |
| 21      | 3           | 7,1                      | 22                     | 0                      | 22    | YES           | 99,7             | 0,29                              | 0,01             | 99,9               | 0,1                | 550        | 3                    | 100              | 0                                 | 0                | 66,7               | 33,3               |
| 22      | 3           | 7,7                      | 4                      | 0                      | 4     | YES           | 99,50            | 0,45                              | 0,05             | 86                 | 14                 | 650        | 46                   | 100              | 0                                 | 0                | 78,3               | 21,7               |
| 23      | 3           | 7,0                      | 5                      | 0                      | 5     | YES           | 99,7             | 0,17                              | 0,13             | 99,6               | 0,52               | 700        | 0                    | 0                | 0                                 | 0                | 0                  | 0                  |
| Average |             |                          | 8,2                    | 0,0                    | 8,2   |               | 99,3             | 0,3                               | 0,3              | 94,3               | 5,2                |            | 36,9                 |                  | 0,0                               | 0,0              | 74,2               | 25,8               |

**Table S1:** Experimental summary of recipient mice. Related to Figure 1 and 2.

| Oligonucleotides |                                       |                               |            |
|------------------|---------------------------------------|-------------------------------|------------|
| name             | sequence                              | Source                        | Identifier |
| GAPDH fwr        | 5'-GGT CCT CAG TGT AGC CCA AG-3'      | Beerling <i>et al.</i> , 2016 | N/A        |
| GAPDH rev        | 5'-AAT GTG TCCGTC GTG GAT CT-3'       | Beerling <i>et al.</i> , 2016 | N/A        |
| E-cad fwr        | 5'-GCT TCA GTT CCG AGG TCT AC-3'      | Beerling <i>et al.</i> , 2016 | N/A        |
| E-cad rev        | 5'-GCC AGT GCA TCC TTC AAA TC-3'      | Beerling <i>et al.</i> , 2016 | N/A        |
| Vim fwr          | 5'-GAG GAG ATG CTC CAG AGA GA-3'      | Beerling <i>et al.</i> , 2016 | N/A        |
| Vim rev          | 5'-TCC TGC AAG GAT TCC ACT TT-3'      | Beerling <i>et al.</i> , 2016 | N/A        |
| FN fwr           | 5'-GGT GTC CGA TAC CAG TGT TAC-3'     | Beerling <i>et al.</i> , 2016 | N/A        |
| FN rev           | 5'-TCT CCG TGA TAA TTA CTT GGA CAG-3' | Beerling <i>et al.</i> , 2016 | N/A        |
| Zeb1 fwr         | 5'-TGG CAA GAC AAC GTG AAA GA-3'      | Beerling <i>et al.</i> , 2016 | N/A        |
| Zeb1 rev         | 5'-AAC TGG GAA AAT GCA TCT GG-3'      | Beerling <i>et al.</i> , 2016 | N/A        |
| N-cad fwr        | 5'-GTG GAG GCT TCT GGT GAA AT-3'      | Beerling <i>et al.</i> , 2016 | N/A        |
| N-cad rev        | 5'-GGC TCG CTG CTT TCA TAC T-3'       | Beerling <i>et al.</i> , 2016 | N/A        |
| Slug fwr         | 5'-TGA TGC CCA GTC TAG GAA AT-3'      | Beerling <i>et al.</i> , 2016 | N/A        |
| Slug rev         | 5'-AGT GAG GGC AAG AGA AAG G-3'       | Beerling <i>et al.</i> , 2016 | N/A        |

**Tabel S2:** Oligonucleotides used in this study. Related to Figure 1 D.
